## Gemykibivirus in acute encephalitis patients

### 1 **Title Page**

### 2 **Article summary line:**

3 Viruses in the genus *Gemykibivirus* can be potential causal agents of encephalitis.

4

### 5 **Running Title:**

6 Gemykibivirus in acute encephalitis patients

7

8

### 9 **Key words:**

10 acute encephalitis syndrome, Gemykibivirus, metagenomic analysis, emerging infection

### 11 **Title:**

12 Gemykibivirus detection in acute encephalitis patients from Nepal

### 13 **Authors:**

14 Eans Tara Tuladhar<sup>1</sup>, Smita Shrestha<sup>1</sup>, Susan Vernon, Lindsay Droit, Kathie A.

15 Mihindikulasuriya, Mamta Tamang, Lata Karki, Annie Elong Ngon, Bimlesh Jha, Bal Krishna

16 Awal, Bimal Sharma Chalise, Runa Jha, Sujan Shresta, David Wang<sup>2</sup>, Krishna Das Manandhar<sup>2</sup>

### 17 **Author affiliations:**

18 Tribhuvan University Central Department of Biotechnology, Kathmandu, Nepal (E.T. Tuladhar,

19 S. Shrestha, L. Karki, M. Tamang, K.D. Manandhar); National Public Health Laboratory,

20 Kathmandu, Nepal (B. Jha, B.K Awal, R. Jha); Sukraraj Tropical and Infectious Disease

21 Hospital, Kathmandu, Nepal (B.S Chalise); La Jolla Institute for Immunology, California, United

22 States (A. Ngon, S. Shresta); Washington University in St. Louis, Missouri, United States (S.

23 Vernon, L. Droit, K. Mihindikulasuriya, D. Wang)

### 24 **Footnotes**

25 <sup>1</sup>These authors contributed equally to this article; <sup>2</sup>Corresponding authors

## Gemykibivirus in acute encephalitis patients

### 26 **Abstract**

27 Acute Encephalitis Syndrome (AES) causes significant morbidity and mortality  
28 worldwide. In Nepal, Japanese encephalitis virus (JEV) accounts for ~ 5-20% of AES  
29 cases, but ~75% of AES cases are of unknown etiology. We identified a gemykibivirus in  
30 CSF collected in 2020 from a male child with AES using metagenomic next-generation  
31 sequencing. Gemykibiviruses are single stranded, circular DNA viruses in the family  
32 *Genomoviridae*. The complete genome of 2211 nucleotides was sequenced which shared  
33 98.69% nucleotide identity to its closest relative, Human associated gemykibivirus 2  
34 isolate SAfia-449D. Two real-time PCR assays were designed, and screening of 337 CSF  
35 and 164 serum samples from AES patients in Nepal collected in 2020 and 2022 yielded  
36 11 CSF and 1 serum sample that were positive in both PCR assays. Complete genomes  
37 of 7 of the positives were sequenced. These results identify a candidate etiologic agent of  
38 encephalitis in Nepal.

## Gemykibivirus in acute encephalitis patients

medRxiv preprint doi: <https://doi.org/10.1101/2024.02.13.24302648>; this version posted February 15, 2024. The copyright holder for this preprint (which was not certified by peer review) is the author/funder, who has granted medRxiv a license to display the preprint in perpetuity. It is made available under a [CC-BY-NC-ND 4.0 International license](#).

### 39 Introduction

40 Encephalitis is a neurological disorder associated with a high mortality rate on a  
41 global scale (1). It is the inflammation of the brain parenchyma with clinical features  
42 of fever, altered mental state, and/or new onset of seizures. At present, low  
43 sociodemographic index regions in Asia and Africa carry the highest burden of  
44 encephalitis (2). In the year 2021, a total of 512 cases of AES were reported in Nepal  
45 (3). More than 100 different infectious agents that cause encephalitis are known  
46 including bacteria, viruses, fungi, and parasites (4, 5). The major known etiologic  
47 agents of encephalitis as reported in Nepal and internationally are Japanese  
48 encephalitis virus (JEV), enteroviruses, herpes simplex, and varicella zoster viruses  
49 (6, 7). In Nepal, there has been a national surveillance program for JE since 2004  
50 wherein CSF and serum samples of suspected viral cases of encephalitis are collected  
51 from sentinel sites throughout Nepal with technical support from WHO and analyzed  
52 at the National Public Health Laboratory (NPHL) by serology for anti-JEV IgM. In  
53 numerous studies in Nepal assessing cases since 2000, ~70-95% of the AES cases per  
54 year have no diagnosis (3, 8-11). A significant fraction of encephalitis in other  
55 countries similarly lack diagnosis, despite extensive testing (5, 12, 13). In recent  
56 years, the application of metagenomic analysis to patients with encephalitis has begun  
57 to identify a range of emerging viruses linked to encephalitis (14-19)  
58 The *Genomoviridae* family of viruses has single stranded DNA genomes of ~2.1-2.2  
59 kb (20) that encode a capsid protein (CP) and a replication associated protein (REP).  
60 They have been identified from a wide range of hosts including plants, insects,  
61 animals, and humans (20-22). There are ten genera in the *Genomiviridae* family (20).  
62 Viruses in the genus *Gemykibivirus* have been identified in multiple human cases and  
63 in multiple specimen types including: blood of febrile Tanzanian children (23); the

## Gemykibivirus in acute encephalitis patients

medRxiv preprint doi: <https://doi.org/10.1101/2024.02.13.24302648>; this version posted February 15, 2024. The copyright holder for this preprint (which was not certified by peer review) is the author/funder, who has granted medRxiv a license to display the preprint in perpetuity. It is made available under a [CC-BY-NC-ND 4.0 International license](#).

64 respiratory tract of an elderly woman with respiratory distress in China (24); feces  
65 from diarrhea patients in Brazil (25); blood of healthy blood donors of Brazil (21);  
66 blood of HIV positive Cameroonian males (26); and in cervical swab of HIV/HPV  
67 infected pregnant females (27). Specific to encephalitis, there are reports of  
68 gemykibiviruses in CSF from an encephalitic child from China (15) and CSF from  
69 three patients with encephalitis from Sri Lanka (25). Furthermore, analysis of  
70 Nepalese sewage yielded the complete genome of a gemykibivirus (25). Here, we  
71 used metagenomic next generation sequencing (NGS) to identify the presence of a  
72 gemykibivirus in CSF from a patient with encephalitis in Nepal. Further PCR  
73 screening identified 12 additional positive cases.

74

## 75 **Materials and Methods**

### 76 **Ethical clearance, study population, and collection of biospecimens:**

77 This study was approved by the Nepal Health Research Council of Nepal [approval#  
78 274-2020] and the Human Research Protection Office of Washington University in  
79 Saint Louis [202004087]. The study population focused on AES patients who were  
80 negative for JE IgM. Residual samples from national JE surveillance sentinel sites in  
81 Nepal were utilized. The index case CSF sample in the NPHL repository was  
82 collected in 2020 from Rupandehi district. For prevalence studies, 122 repository  
83 specimens (82 CSF, 40 sera) collected in 2020 and 379 repository specimens (255  
84 CSF, 124 sera) from 2022 were tested by PCR for gemykibivirus.

### 85 **Total nucleic acid extraction**

86 Total nucleic acid extraction was performed using the Invitrogen Pure Link™ Viral  
87 RNA/DNA mini kit [Thermo Fisher Scientific] and eluted in 50 µL volume following  
88 the instruction manual of the kit. Samples were stored at -80°C.

## Gemykibivirus in acute encephalitis patients

medRxiv preprint doi: <https://doi.org/10.1101/2024.02.13.24302648>; this version posted February 15, 2024. The copyright holder for this preprint (which was not certified by peer review) is the author/funder, who has granted medRxiv a license to display the preprint in perpetuity. It is made available under a [CC-BY-NC-ND 4.0 International license](#).

### 89 **Metagenomic NGS analysis**

90 Extracted total nucleic acid were randomly amplified as described previously (28)  
91 and used for library construction with NEBNext Ultra DNA Library Prep Kit for  
92 Illumina (New England Biolabs). The sample library was sequenced on the Illumina  
93 MiSeq instrument using the 2 × 250 bp paired-end protocol. NGS data was analyzed  
94 for presence of viruses using CZID (29). NGS data is available at ENA:  
95 PRJEB72279.

### 96 **Genome sequencing of index case and additional cases**

97 The NGS contigs were confirmed using PCR, cloning, and sanger sequencing with  
98 primers (Appendix Table 1). Using a pair of primers that amplified the entire circular  
99 genome, Gemy1xgenomeF  
100 (5'TTAATCGATCTAGAGGATCCTTGTTAGATATCCATATGGCCG-3') and  
101 Gemy1xgenomeR (5'-TTAGTAATGGGCCCGGATCCACGAGAGGAACACG-3'),  
102 three independent PCR reactions were performed, and the resulting fragments were  
103 cloned into pCR4.0 and sequenced using the Oxford Nanopore technologies  
104 (Plasmidsaurus). Additional positive cases were similarly amplified and whole  
105 genomes sequenced to 3X coverage. Complete genomes sequences are available at  
106 Genbank (Accession# PP270194-PP270201).

### 107 **Gemykibivirus qPCR development**

108 Two sets of Taqman real time PCR primers and probes were designed using express  
109 software (Applied Biosystems), one targeting the CP gene and the other targeting the  
110 REP gene. The primers and the probes were supplied by IDT (Integrated DNA  
111 Technologies, USA). The first assay, Gemy\_1, targets the CP gene using primers  
112 GemykibiTM\_8917F (5'-ACCTCTTATCCGGTTTGGCA-3') and  
113 GemykibiTM\_8917R (5'-AGCGCGAAATTCCTCTTGAC-3') and the probe

## Gemykibivirus in acute encephalitis patients

medRxiv preprint doi: <https://doi.org/10.1101/2024.02.13.24302648>; this version posted February 15, 2024. The copyright holder for this preprint (which was not certified by peer review) is the author/funder, who has granted medRxiv a license to display the preprint in perpetuity. It is made available under a [CC-BY-NC-ND 4.0 International license](https://creativecommons.org/licenses/by-nc-nd/4.0/).

114 GemykibiTM\_8917Probe(5'-[6-  
115 FAM]CGGACCTGA[ZEN]CCGGATGCCCGG[3IABkFQ]-3') that uses FAM and  
116 the dual quencher Zen and Iowa Black. The second assay, Gemy\_2, targets the REP  
117 gene with GemykibiTM\_9967F (5'-GGTCAGAGCCTAGTGTGTATG-3')  
118 GemykibiTM\_9967R (5'-CGACGTTGTCTGTGTCTTCT-3')  
119 GemykibiTM\_9967Probe (5'-[6-FAM]AAGACACTC[ZEN]TGGGCAAGAAGCC  
120 TT[IABkFQ]-3') using the same fluor and quencher.  
121 For both assays, standard curves were generated using serial 10-fold dilution ranging  
122 from  $2 \times 10^8$  to  $2 \times 10^1$  copies of positive control plasmid [plasmid PCR4 containing the  
123 respective target sequence]. A 20  $\mu$ L PCR mixture was made comprising 2  $\mu$ L of  
124 extracted nucleic acid sample, 10  $\mu$ L of 2x TaqMan Fast Advanced Master Mix  
125 [Thermo Fisher Scientific], and 5 pmol of each primer and probe. The PCR reactions  
126 were performed in 96-well plates on a CFX Opus 96 thermocycler [Bio-Rad] with one  
127 negative control nuclease free water in each row and one positive control of  $2 \times 10^3$   
128 copies per plate. The cycling conditions were 50°C for 2 mins, 95°C for 30 secs and  
129 40 cycles of 95°C for 5 secs followed by 60°C for 30 secs. The threshold of all plates  
130 was set at standard value and data was analyzed using Bio-Rad CFX Maestro 2.3  
131 software. Samples were counted as positive if their threshold cycle (Ct) value was less  
132 than 33.

### 133 **Phylogenetic analysis**

134 Representative protein sequences of the REP gene of prototypes of each genus in the  
135 *Genomoviridae* were downloaded from GenBank. Alignments were generated using  
136 Clustal Omega ([30](https://doi.org/10.1093/bioinformatics/btu159)). The alignment converted to fasta via  
137 [http://sequenceconversion.bugaco.com/converter/biology/sequences/clustal\\_to\\_fasta.p](http://sequenceconversion.bugaco.com/converter/biology/sequences/clustal_to_fasta.php)  
138 [hp](http://sequenceconversion.bugaco.com/converter/biology/sequences/clustal_to_fasta.php). Maximum likelihood trees were generated with bootstrapping, using W-IQ-TREE

## Gemykibivirus in acute encephalitis patients

medRxiv preprint doi: <https://doi.org/10.1101/2024.02.13.24302648>; this version posted February 15, 2024. The copyright holder for this preprint (which was not certified by peer review) is the author/funder, who has granted medRxiv a license to display the preprint in perpetuity. It is made available under a [CC-BY-NC-ND 4.0 International license](#).

139 (31). Trees were visualized using iTOL (32). All available complete genomes in the  
140 species *Gemykibivirus humas2* were downloaded from Genbank along with  
141 representative genomes from the species *Gemykibivirus humas 1, 3, 4, and 5*, and the  
142 top 10 additional complete genomes with highest BLASTn scores. Alignments were  
143 generated using Clustal Omega (30) Maximum likelihood trees were generated with  
144 bootstrapping, using W-IQ-TREE (31). Trees were visualized using iTOL (32) .

145

## 146 Results

### 147 Detection of a gemykibivirus by metagenomic NGS

148 NGS of nucleic acids extracted from the CSF of a male child yielded reads that could  
149 be assembled into two contigs that shared 97 and 99% nucleotide similarity with  
150 human associated Gemykibivirus2 SAfia-449D (accession# MN765187.1). Using  
151 PCR, gaps between the two contigs were spanned to generate a complete circular  
152 genome of 2211 nt. To formally assess the taxonomic relationship of this virus to  
153 viruses in the family *Genomoviridae*, we generated a maximum likelihood  
154 phylogenetic tree of the REP protein with the type species of each genus, in  
155 accordance with the ICTV guidelines (20, 22) (Figure 1A). The virus was most  
156 similar to the prototype virus from the genus *Gemykibivirus*. To further assess its  
157 relationship within the genus *Gemykibivirus*, we generated a maximum likelihood tree  
158 using the whole genome sequence (Figure 1B), which demonstrated it is most closely  
159 related to Human gemykibivirus 2 SAfia-449D, a virus detected in blood of  
160 Tanzanian children (23), with 98.69% nucleotide identity. Based on these criteria, the  
161 virus genome from the index case was designated Human gemykibivirus 2  
162 Nepal/N0000051/2020. Human gemykibivirus 2 Nepal/N0000051/2020 was also  
163 closely related to Gemycircularvirus-SL1 (accession# KP133075), a previously

## Gemykibivirus in acute encephalitis patients

medRxiv preprint doi: <https://doi.org/10.1101/2024.02.13.24302648>; this version posted February 15, 2024. The copyright holder for this preprint (which was not certified by peer review) is the author/funder, who has granted medRxiv a license to display the preprint in perpetuity. It is made available under a [CC-BY-NC-ND 4.0 International license](#).

164 reported gemykibivirus detected in CSF from an encephalitis patient in Sri Lanka (25)  
165 sharing 97.96% nucleotide identity (33 SNPs across the genome and a 12 bp insertion  
166 located in a region of tandem repeat hexamers) and it shared 98.64% identity to  
167 another gemykibivirus, Gemycircularvirus NP (accession# KP133080), detected in  
168 sewage from Nepal (25).

169 Gene predictions identified three ORFs, characteristic of Gemykibiviruses (Figure 2).  
170 The CP ORF is 969 bp, the REP ORF, generated by splicing is 1114 bp, and the  
171 unknown ORF3, which overlaps with the REP ORF, is 702 bp. A large intergenic  
172 region (LIR) of 127bp is present, and the putative viral origin of replication nona-  
173 nucleotide motif 5'-TAAAATTTA-3' described in Gemycircularvirus NP (accession#  
174 KP133080) is conserved. A predicted stem loop in the LIR is observed from  
175 nucleotides 23 to 57. The stem loop structure is present in genomoviruses and  
176 geminiviruses where it is necessary for rolling circle replication (33, 34).

### 177 Identification of additional positive specimens from encephalitis patients

178 To define the prevalence of this virus, two Taqman real-time PCR assays were  
179 designed and validated, one targeting the REP gene and one targeting the CP gene  
180 (Appendix Figure 1). A total of 337 CSF samples and 164 serum samples were tested  
181 using both assays. Sample with Ct. values <33 for both assays were considered  
182 positive. There were three gemykibivirus positive CSF specimens from 2020 and 9  
183 positive specimens (8 CSF and 1 serum) from 2022 (Table). The prevalence rate in  
184 CSF was 3.3% (11/337) and in serum was 0.6% (1/164). Positive patients ranged  
185 from 4 months to 72 years of age. Including the index case, there were 7 male and 6  
186 female patients. Geographically, most positive patients were from districts in south-  
187 central Nepal (Figure 3). Unfortunately, no additional clinical details are available for  
188 the patients in this study besides meeting the acute case definition of encephalitis.



189 **Whole genome sequencing and phylogenetic analysis of additional positive cases**

190 From the 10 positive specimens with highest Gemykibivirus copy number, we tried to  
191 amplify the whole genome using PCR. For 7 of the samples, we obtained amplicons  
192 that corresponded to the whole genome. These were cloned and sequenced to 3X  
193 coverage to determine their consensus sequences. These 7 genomes varied from the  
194 index genome by 4 to 21 SNPs. The intron of the Rep gene contains a region with  
195 seven tandemly repeated hexamers, and deletions of one or more of the hexamers are  
196 observed in some of the genomes. Phylogenetic analysis of the complete genomes  
197 demonstrated that they formed a clade that included known Gemykibiviruses  
198 previously detected in human CSF, stool, and blood.

199 **Discussion**

200 We used metagenomic NGS to detect Human gemykibivirus2 Nepal/N0000051/2020  
201 in CSF of a male encephalitic child from Rupandehi district (Figure 3) of Nepal which  
202 is alongside the border with India. Further screening through qPCR identified an  
203 additional 12 positive specimens from patient samples collected in 2020 and 2022.

204 We found that these cases were mostly concentrated in and around the south-central  
205 region of Nepal (Figure 3).

206 The identified virus genomes were very closely related (97.96% nt. identity) to a  
207 gemykibivirus previously detected in CSF from three encephalitis patients from Sri  
208 Lanka (25). In addition, a distinct gemykibivirus (Human gemykibivirus 4) has also  
209 been reported in CSF of an encephalitis patient from China (15). Together with our  
210 study, these data implicate viruses in the genus *Gemykibivirus* as potential causal  
211 agents of encephalitis. There is one report of *Gemykibivirus* in sewage from Nepal  
212 from 2012, which is also highly similar to the sequences we detected in Nepalese  
213 patients from 2020-2022. This suggests that gemykibivirus has been circulating in

## Gemykibivirus in acute encephalitis patients

medRxiv preprint doi: <https://doi.org/10.1101/2024.02.13.24302648>; this version posted February 15, 2024. The copyright holder for this preprint (which was not certified by peer review) is the author/funder, who has granted medRxiv a license to display the preprint in perpetuity. It is made available under a [CC-BY-NC-ND 4.0 International license](#).

214 Nepal for at least the past decade. Furthermore, detection in sewage, raises the  
215 possibility that gemykibivirus may be transmitted fecal-orally, similarly to some  
216 neurotropic viruses such as polio and enteroviruses. Detection of highly similar  
217 viruses in patients in Tanzania (23) and Brazil (21) suggests that gemykibiviruses are  
218 globally widespread.

219 One limitation of this study is that the samples analyzed were residual specimens  
220 from a surveillance repository without additional available clinical metadata, thus  
221 limiting our knowledge of the precise symptoms, disease severity, and outcomes of  
222 these patients. While detection of gemykibiviruses in presumptively sterile CSF  
223 supports the hypothesis that they could be causal agents of encephalitis, additional  
224 research to culture the virus and establish animal models to fulfill Koch's postulates  
225 are needed to definitively establish causality. In addition, more prevalence studies in  
226 encephalitis and other diseases are also needed as are serological studies to define the  
227 extent of human infection by gemykibiviruses. Finally, additional, unbiased  
228 approaches are needed to define the etiologies of encephalitis in Nepal, and  
229 worldwide.

230

### 231 **Acknowledgment.**

232 This project was supported by National Institutes of Health grant U01AI151810.

233

234 **Biographical sketch of first author:** Dr. Tuladhar, MD is currently pursuing a PhD at  
235 Tribhuvan University Central Department of Biotechnology, Nepal studying emerging viral  
236 infections. [ORCID:0000-0001-5705-3953]

237

238

## Gemykibivirus in acute encephalitis patients

medRxiv preprint doi: <https://doi.org/10.1101/2024.02.13.24302648>; this version posted February 15, 2024. The copyright holder for this preprint (which was not certified by peer review) is the author/funder, who has granted medRxiv a license to display the preprint in perpetuity. It is made available under a [CC-BY-NC-ND 4.0 International license](#).

### 239 **Corresponding author's mailing address**

240 David Wang

241 ORCID:0000-0002-0827-196X

242 314-286-1123 (phone)

243 314-286-1232 (FAX)

244 [davewang@wustl.edu](mailto:davewang@wustl.edu)

245 Washington University in St. Louis School of Medicine

246 660 S. Euclid Ave

247 St. Louis, MO 63110

248 USA

249 Krishna Das Manandhar

250 ORCID :0000-0002-6798-4935

251 +977 9860 960 577 (Phone)

252 [krishna.manandhar@gmail.com](mailto:krishna.manandhar@gmail.com)

253 Central Department of Biotechnology, Tribhuvan University

254 TU Road, Kirtipur, Nepal

255

256

## Gemykibivirus in acute encephalitis patients

medRxiv preprint doi: <https://doi.org/10.1101/2024.02.13.24302648>; this version posted February 15, 2024. The copyright holder for this preprint (which was not certified by peer review) is the author/funder, who has granted medRxiv a license to display the preprint in perpetuity. It is made available under a [CC-BY-NC-ND 4.0 International license](#).

### 257 **References**

- 258 1. Why encephalitis matters? Report of the virtual meeting, 28-29 June 2022. Geneva:  
259 World Health Organization; 2023.
- 260 2. Wang H, Zhao S, Wang S, Zheng Y, Wang S, Chen H, et al. Global magnitude of  
261 encephalitis burden and its evolving pattern over the past 30 years. *J Infect.* 2022  
262 Jun;84(6):777-87.
- 263 3. Department of Health Services Annual Report 2078/79. Kathmandu: Government of  
264 Nepal Ministry of Health and Population; 2021/2022.
- 265 4. Granerod J, Cunningham R, Zuckerman M, Mutton K, Davies NW, Walsh AL, et al.  
266 Causality in acute encephalitis: defining aetiologies. *Epidemiol Infect.* 2010 Jun;138(6):783-  
267 800.
- 268 5. Glaser CA, Honarmand S, Anderson LJ, Schnurr DP, Forghani B, Cossen CK, et al.  
269 Beyond viruses: clinical profiles and etiologies associated with encephalitis. *Clin Infect Dis.*  
270 2006 Dec 15;43(12):1565-77.
- 271 6. Granerod J, Ambrose HE, Davies NW, Clewley JP, Walsh AL, Morgan D, et al.  
272 Causes of encephalitis and differences in their clinical presentations in England: a  
273 multicentre, population-based prospective study. *Lancet Infect Dis.* 2010 Dec;10(12):835-44.
- 274 7. Rayamajhi P, Nepal G, Ojha R, Rajbhandari R, Gajurel BP, Karn R. Evaluating  
275 cognitive outcomes in adult patients with acute encephalitis syndrome: a prospective study  
276 from a tertiary care center in Nepal. *Encephalitis.* 2022 Apr;2(2):36-44.
- 277 8. Khanal B, Singh RR, Bhattacharya SK. Japanese encephalitis in eastern Nepal: access  
278 to the laboratory diagnosis. *15th ICID Abstracts / International Journal of Infectious*  
279 *Diseases.* 2012:e88.
- 280 9. Dhital B, Bhat N. Clinico-epidemiological presentation of acute encephalitis  
281 syndrome in patients visiting a tertiary hospital in Kathmandu, Nepal: A descriptive cross-  
282 sectional study. *Journal of Gandaki Medical College-Nepal.* 2022;15(2):168-72.
- 283 10. Rayamajhi A, Ansari I, Ledger E, Bista KP, Impoinvil DE, Nightingale S, et al.  
284 Clinical and prognostic features among children with acute encephalitis syndrome in Nepal; a  
285 retrospective study. *BMC Infect Dis.* 2011 Oct 28;11:294.
- 286 11. Kumar Pant D, Tenzin T, Chand R, Kumar Sharma B, Raj Bist P. Spatio-temporal  
287 epidemiology of Japanese encephalitis in Nepal, 2007-2015. *PLoS One.*  
288 2017;12(7):e0180591.
- 289 12. Huppatz C, Durrheim DN, Levi C, Dalton C, Williams D, Clements MS, et al.  
290 Etiology of encephalitis in Australia, 1990-2007. *Emerg Infect Dis.* 2009 Sep;15(9):1359-65.
- 291 13. Mailles A, Stahl JP, Steering C, Investigators G. Infectious encephalitis in France in  
292 2007: a national prospective study. *Clin Infect Dis.* 2009 Dec 15;49(12):1838-47.
- 293 14. Edridge AWD, Deijns M, Namazzi R, Cristella C, Jebbink MF, Maurer I, et al. Novel  
294 Orthobunyavirus Identified in the Cerebrospinal Fluid of a Ugandan Child With Severe  
295 Encephalopathy. *Clin Infect Dis.* 2019 Jan 1;68(1):139-42.
- 296 15. Zhou C, Zhang S, Gong Q, Hao A. A novel gemycircularvirus in an unexplained case  
297 of child encephalitis. *Virology.* 2015 Nov 24;12:197.
- 298 16. Smits SL, Zijlstra EE, van Hellemond JJ, Schapendonk CM, Bodewes R, Schurch  
299 AC, et al. Novel cyclovirus in human cerebrospinal fluid, Malawi, 2010-2011. *Emerg Infect*  
300 *Dis.* 2013;19(9):1511-3.
- 301 17. Liu Q, Wang X, Xie C, Ding S, Yang H, Guo S, et al. A Novel Human Acute  
302 Encephalitis Caused by Pseudorabies Virus Variant Strain. *Clin Infect Dis.* 2021 Dec  
303 6;73(11):e3690-e700.

## Gemykibivirus in acute encephalitis patients

medRxiv preprint doi: <https://doi.org/10.1101/2024.02.13.24302648>; this version posted February 15, 2024. The copyright holder for this preprint (which was not certified by peer review) is the author/funder, who has granted medRxiv a license to display the preprint in perpetuity. It is made available under a [CC-BY-NC-ND 4.0 International license](https://creativecommons.org/licenses/by-nc-nd/4.0/).

- 304 18. Manso CF, Bibby DF, Mohamed H, Brown DWG, Zuckerman M, Mbisa JL.  
305 Enhanced Detection of DNA Viruses in the Cerebrospinal Fluid of Encephalitis Patients  
306 Using Metagenomic Next-Generation Sequencing. *Front Microbiol.* 2020;11:1879.
- 307 19. Quan PL, Wagner TA, Briese T, Torgerson TR, Hornig M, Tashmukhamedova A, et  
308 al. Astrovirus encephalitis in boy with X-linked agammaglobulinemia. *Emerg Infect Dis.*  
309 2010 Jun;16(6):918-25.
- 310 20. Varsani A, Krupovic M. Family Genomoviridae: 2021 taxonomy update. *Arch Virol.*  
311 2021 Oct;166(10):2911-26.
- 312 21. Zucherato VS, Giovanetti M, Costa LOA, Krause LMF, Alves DCC, Moreira RMA,  
313 et al. Molecular identification of the emerging Human Gemykibivirus-2 (HuGkV-2) among  
314 Brazilian blood donors. *Transfus Apher Sci.* 2023 Feb;62(1):103516.
- 315 22. International Committee on Taxonomy of Viruses (ICTV):  
316 <https://ictv.global/taxonomy/>. [cited 2023; Available from: <https://ictv.global/taxonomy/>
- 317 23. Cordey S, Laubscher F, Hartley MA, Junier T, Keitel K, Docquier M, et al. Blood  
318 virosphere in febrile Tanzanian children. *Emerg Microbes Infect.* 2021 Dec;10(1):982-93.
- 319 24. Wang J, Li Y, He X, Ma J, Hong W, Hu F, et al. Gemykibivirus Genome in Lower  
320 Respiratory Tract of Elderly Woman With Unexplained Acute Respiratory Distress  
321 Syndrome. *Clin Infect Dis.* 2019 Aug 16;69(5):861-4.
- 322 25. Phan TG, Mori D, Deng X, Rajindrajith S, Ranawaka U, Fan Ng TF, et al. Small  
323 circular single stranded DNA viral genomes in unexplained cases of human encephalitis,  
324 diarrhea, and in untreated sewage. *Virology.* 2015 Aug;482:98-104.
- 325 26. Orf GS, Olivo A, Harris B, Weiss SL, Achari A, Yu G, et al. Metagenomic Detection  
326 of Divergent Insect- and Bat-Associated Viruses in Plasma from Two African Individuals  
327 Enrolled in Blood-Borne Surveillance. *Viruses.* 2023 Apr 21;15(4).
- 328 27. Siqueira JD, Curty G, Xutao D, Hofer CB, Machado ES, Seuanes HN, et al.  
329 Composite Analysis of the Virome and Bacteriome of HIV/HPV Co-Infected Women  
330 Reveals Proxies for Immunodeficiency. *Viruses.* 2019 May 7;11(5).
- 331 28. Lim ES, Zhou Y, Zhao G, Bauer IK, Droit L, Ndao IM, et al. Early life dynamics of  
332 the human gut virome and bacterial microbiome in infants. *Nat Med.* 2015 Oct;21(10):1228-  
333 34.
- 334 29. Kalantar KL, Carvalho T, de Bourcy CFA, Dimitrov B, Dingle G, Egger R, et al.  
335 IDseq-An open source cloud-based pipeline and analysis service for metagenomic pathogen  
336 detection and monitoring. *Gigascience.* 2020 Oct 15;9(10).
- 337 30. Sievers F, Wilm A, Dineen D, Gibson TJ, Karplus K, Li W, et al. Fast, scalable  
338 generation of high-quality protein multiple sequence alignments using Clustal Omega. *Mol*  
339 *Syst Biol.* 2011 Oct 11;7:539.
- 340 31. Trifinopoulos J, Nguyen LT, von Haeseler A, Minh BQ. W-IQ-TREE: a fast online  
341 phylogenetic tool for maximum likelihood analysis. *Nucleic Acids Res.* 2016 Jul  
342 8;44(W1):W232-5.
- 343 32. Letunic I, Bork P. Interactive Tree Of Life (iTOL) v5: an online tool for phylogenetic  
344 tree display and annotation. *Nucleic Acids Res.* 2021 Jul 2;49(W1):W293-W6.
- 345 33. Yu X, Li B, Fu Y, Jiang D, Ghabrial SA, Li G, et al. A geminivirus-related DNA  
346 mycovirus that confers hypovirulence to a plant pathogenic fungus. *Proc Natl Acad Sci U S*  
347 *A.* 2010 May 4;107(18):8387-92.
- 348 34. Heyraud F, Matzeit V, Schaefer S, Schell J, Gronenborn B. The conserved  
349 nonanucleotide motif of the geminivirus stem-loop sequence promotes replicational release of  
350 virus molecules from redundant copies. *Biochimie.* 1993;75(7):605-15.

351

352

## Gemykibivirus in acute encephalitis patients

medRxiv preprint doi: <https://doi.org/10.1101/2024.02.13.24302648>; this version posted February 15, 2024. The copyright holder for this preprint (which was not certified by peer review) is the author/funder, who has granted medRxiv a license to display the preprint in perpetuity. It is made available under a [CC-BY-NC-ND 4.0 International license](https://creativecommons.org/licenses/by-nc-nd/4.0/).

353 Table: Patient demographics and qPCR Ct. values of gemykibivirus positive cases

| Sample ID <sup>†</sup> | Specimen | Age group<br>[yrs] | Gender | Ct.<br>Gemy_1 <sup>‡</sup> | Ct.<br>Gemy_2 <sup>§</sup> | Specimen<br>collection date | Districts <sup>¶</sup> | Province |
|------------------------|----------|--------------------|--------|----------------------------|----------------------------|-----------------------------|------------------------|----------|
| N0000218               | CSF      | 11-15              | M      | 32.42                      | 30.68                      | 2020 Feb                    | Kaski                  | Gandaki  |
| N0000256               | CSF      | 0-5                | F      | 29.41                      | 29.34                      | 2020 July                   | Myagdi                 | Gandaki  |
| N0000300               | CSF      | 6-10               | F      | 32.95                      | 31.46                      | 2020 Sep                    | Palpa                  | Lumbini  |
| N0000358               | Serum    | 0-5                | M      | 29.27                      | 29.94                      | 2022 Feb                    | Sarlahi                | Madhesh  |
| N0000359               | CSF      | 0-5                | F      | 27.4                       | 27.08                      | 2022 Feb                    | Kapilvastu             | Lumbini  |
| N0000395               | CSF      | 0-5                | M      | 30.74                      | 30.73                      | 2022 April                  | Kaski                  | Gandaki  |
| N0000434               | CSF      | 56-60              | M      | 29.02                      | 30.06                      | 2022 June                   | Lalitpur               | Bagmati  |
| N0000468               | CSF      | 30-35              | F      | 30.84                      | 31.47                      | 2022 July                   | Chitwan                | Bagmati  |
| N0000490               | CSF      | unknown            | M      | 29.86                      | 32.08                      | 2022 July                   | Syangja                | Gandaki  |
| N0000545               | CSF      | 70-75              | F      | 26.84                      | 25.35                      | 2022 Aug                    | Kathmandu              | Bagmati  |
| N0000546               | CSF      | 20-25              | M      | 24.65                      | 23.53                      | 2022 Aug                    | Kathmandu              | Bagmati  |
| N0000722               | CSF      | 20-25              | F      | 28.74                      | 29.72                      | 2022 Nov                    | Chitwan                | Bagmati  |

354 \*Ct., cycle threshold; yrs, years.

355 <sup>†</sup>The sample IDs are coded and are not known outside the research group.

356 <sup>‡</sup>Gemy\_1: qPCR targeting capsid protein gene.

357 <sup>§</sup>Gemy\_2: qPCR targeting replication associated protein (REP) gene.

358 <sup>¶</sup>Districts involved are highlighted in Figure 3 as shade.

359

360

361

362

363

364

365

## Gemykibivirus in acute encephalitis patients

medRxiv preprint doi: <https://doi.org/10.1101/2024.02.13.24302648>; this version posted February 15, 2024. The copyright holder for this preprint (which was not certified by peer review) is the author/funder, who has granted medRxiv a license to display the preprint in perpetuity. It is made available under a [CC-BY-NC-ND 4.0 International license](#).

### 366 Appendices

### 367 Appendix Table: Primers used for PCR

| Primer name      | Sequence 5' to 3'                         | Binding Sites |
|------------------|-------------------------------------------|---------------|
| Gemy8917-9967F   | TCAACGACCTCTGATACATACC                    | 429 <- 451    |
| Gemy8917-9967R   | TAGATGAGTTCCACCATCAGC                     | 2034 -> 2055  |
| Gemi1625confirmR | GGCATTGCAATTATGGCTTATGGT                  | 88 -> 113     |
| Gemi1625confirmF | GGCAAGAAACTCGTCCACTGGG                    | 1194 <- 1215  |
| Gemy9967-8917R   | TCATAATCTGCTCCGTGTTCCCT                   | 1133 -> 1154  |
| GemykibITM_9967F | GGTCAGAGCCTAGTGTTGTATG                    | 1419 <- 1440  |
| Gemy1xgenomeF    | TTAATCGATCTAGAGGATCCTTGTAGATATCCATATGGCGG | 1160 -> 1187  |
| Gemy1xgenomeR    | TTAGTAATGGGCCCGGATCCACGAGAGGAACACG        | 1146 <- 1165  |

368

### 369 **Figure Legends.**

370

371 **Figure 1.** Phylogenetic trees of (A) amino acid sequences of the index case REP protein and  
372 representatives of each genus in the family *Genomoviridae*; (B) whole genome nucleotide  
373 sequences of the positive samples from Nepal compared to other genomes within the genus  
374 *Gemykibivirus*.

375 **Figure 2.** Schematic of the genome of Human gemykibivirus 2 Nepal/N0000051/2020.

376 **Figure 3.** Map of Nepal and locations of the gemykibivirus positive cases [shaded].

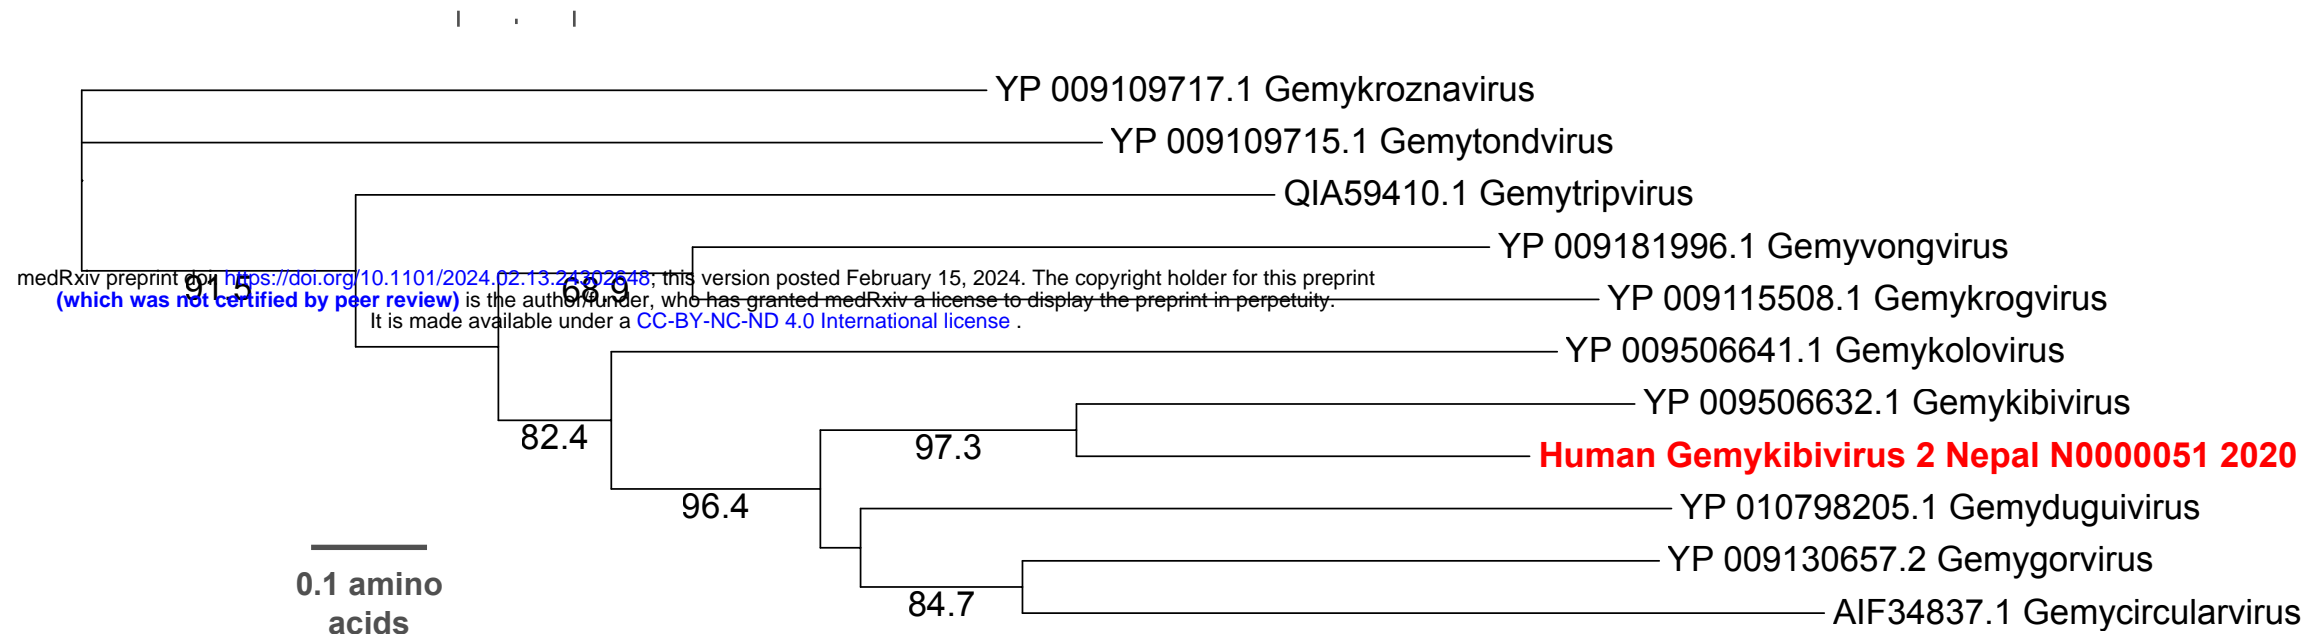



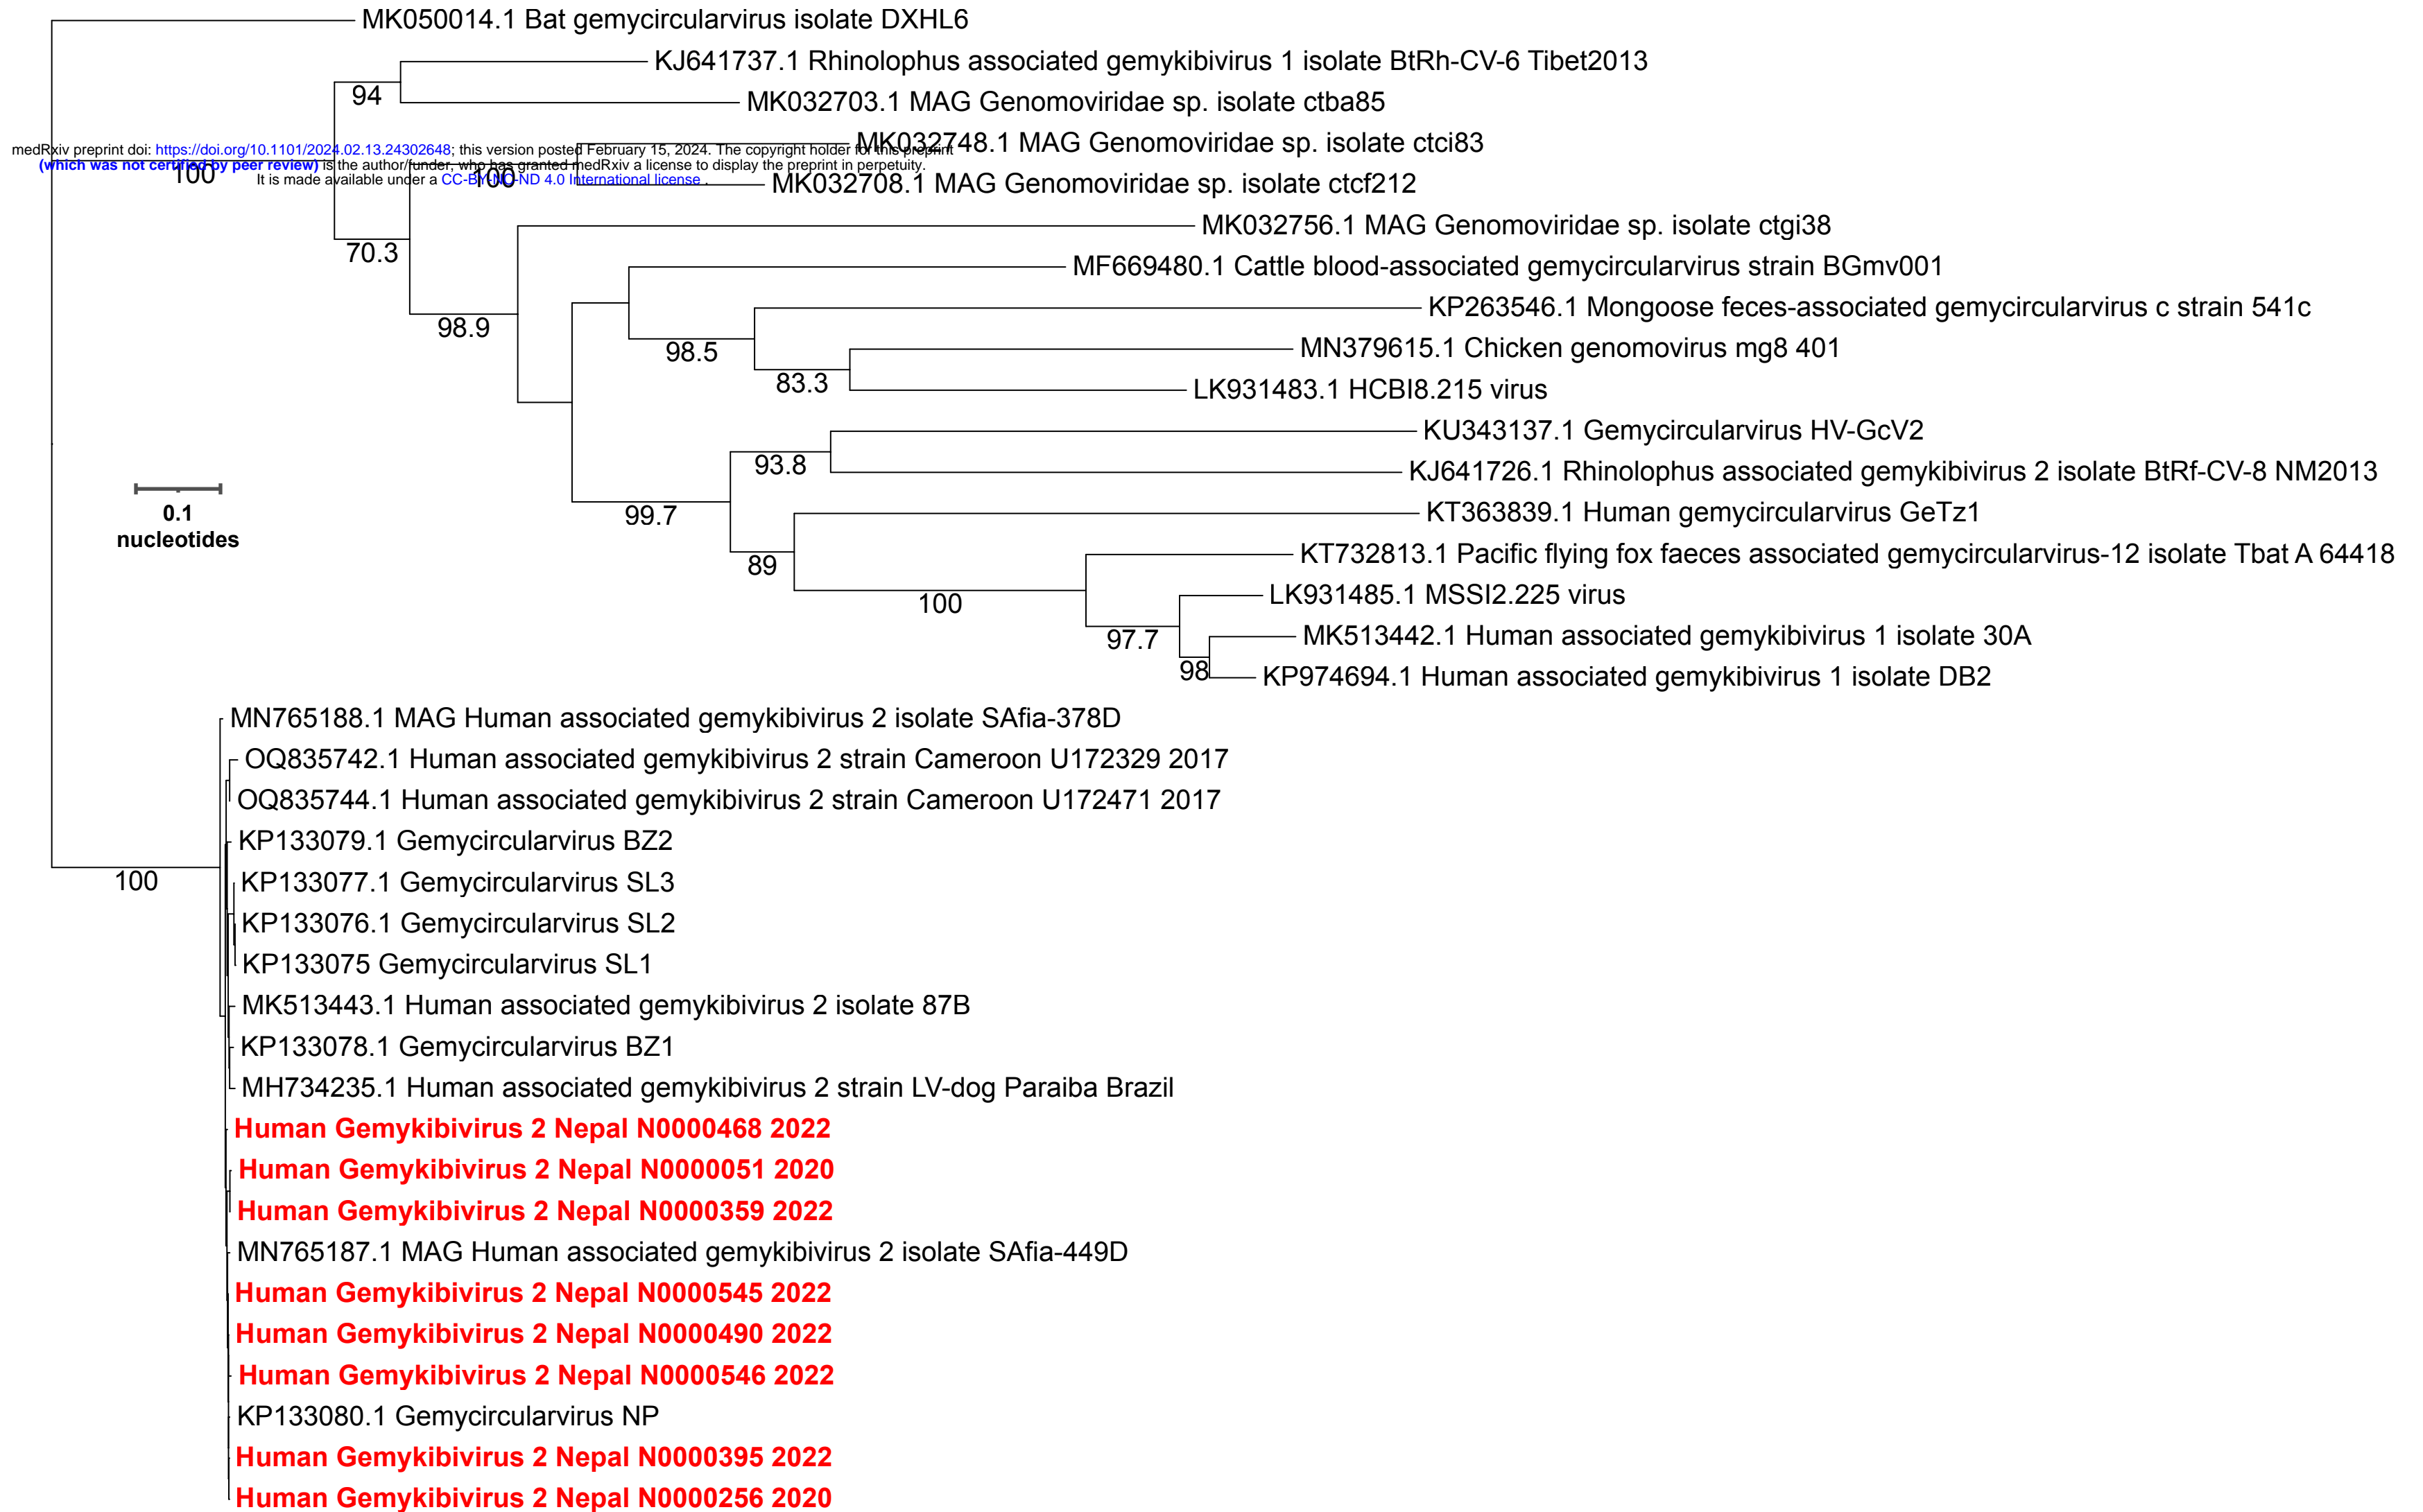

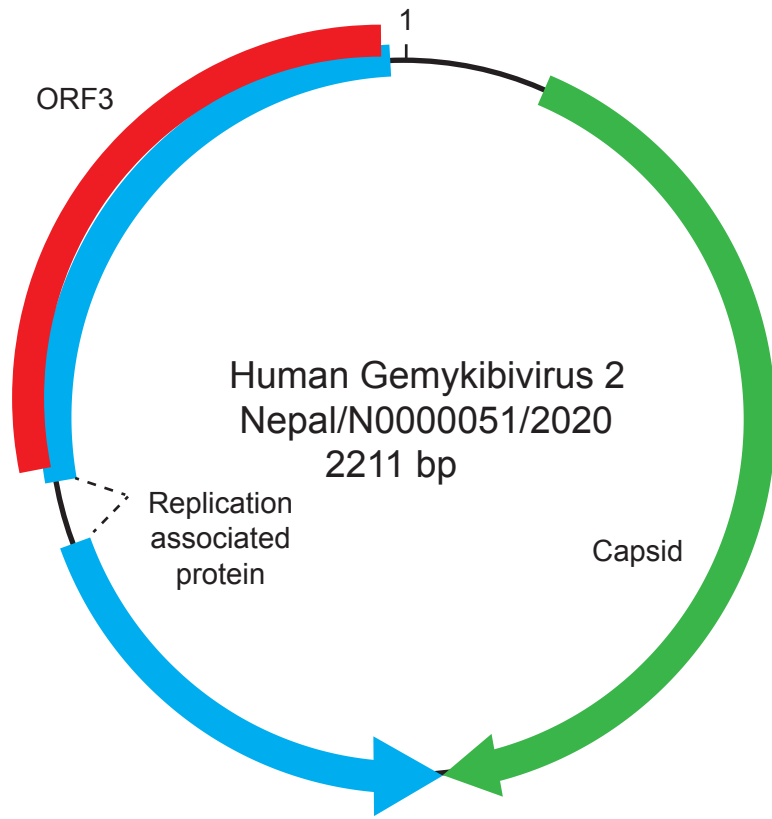

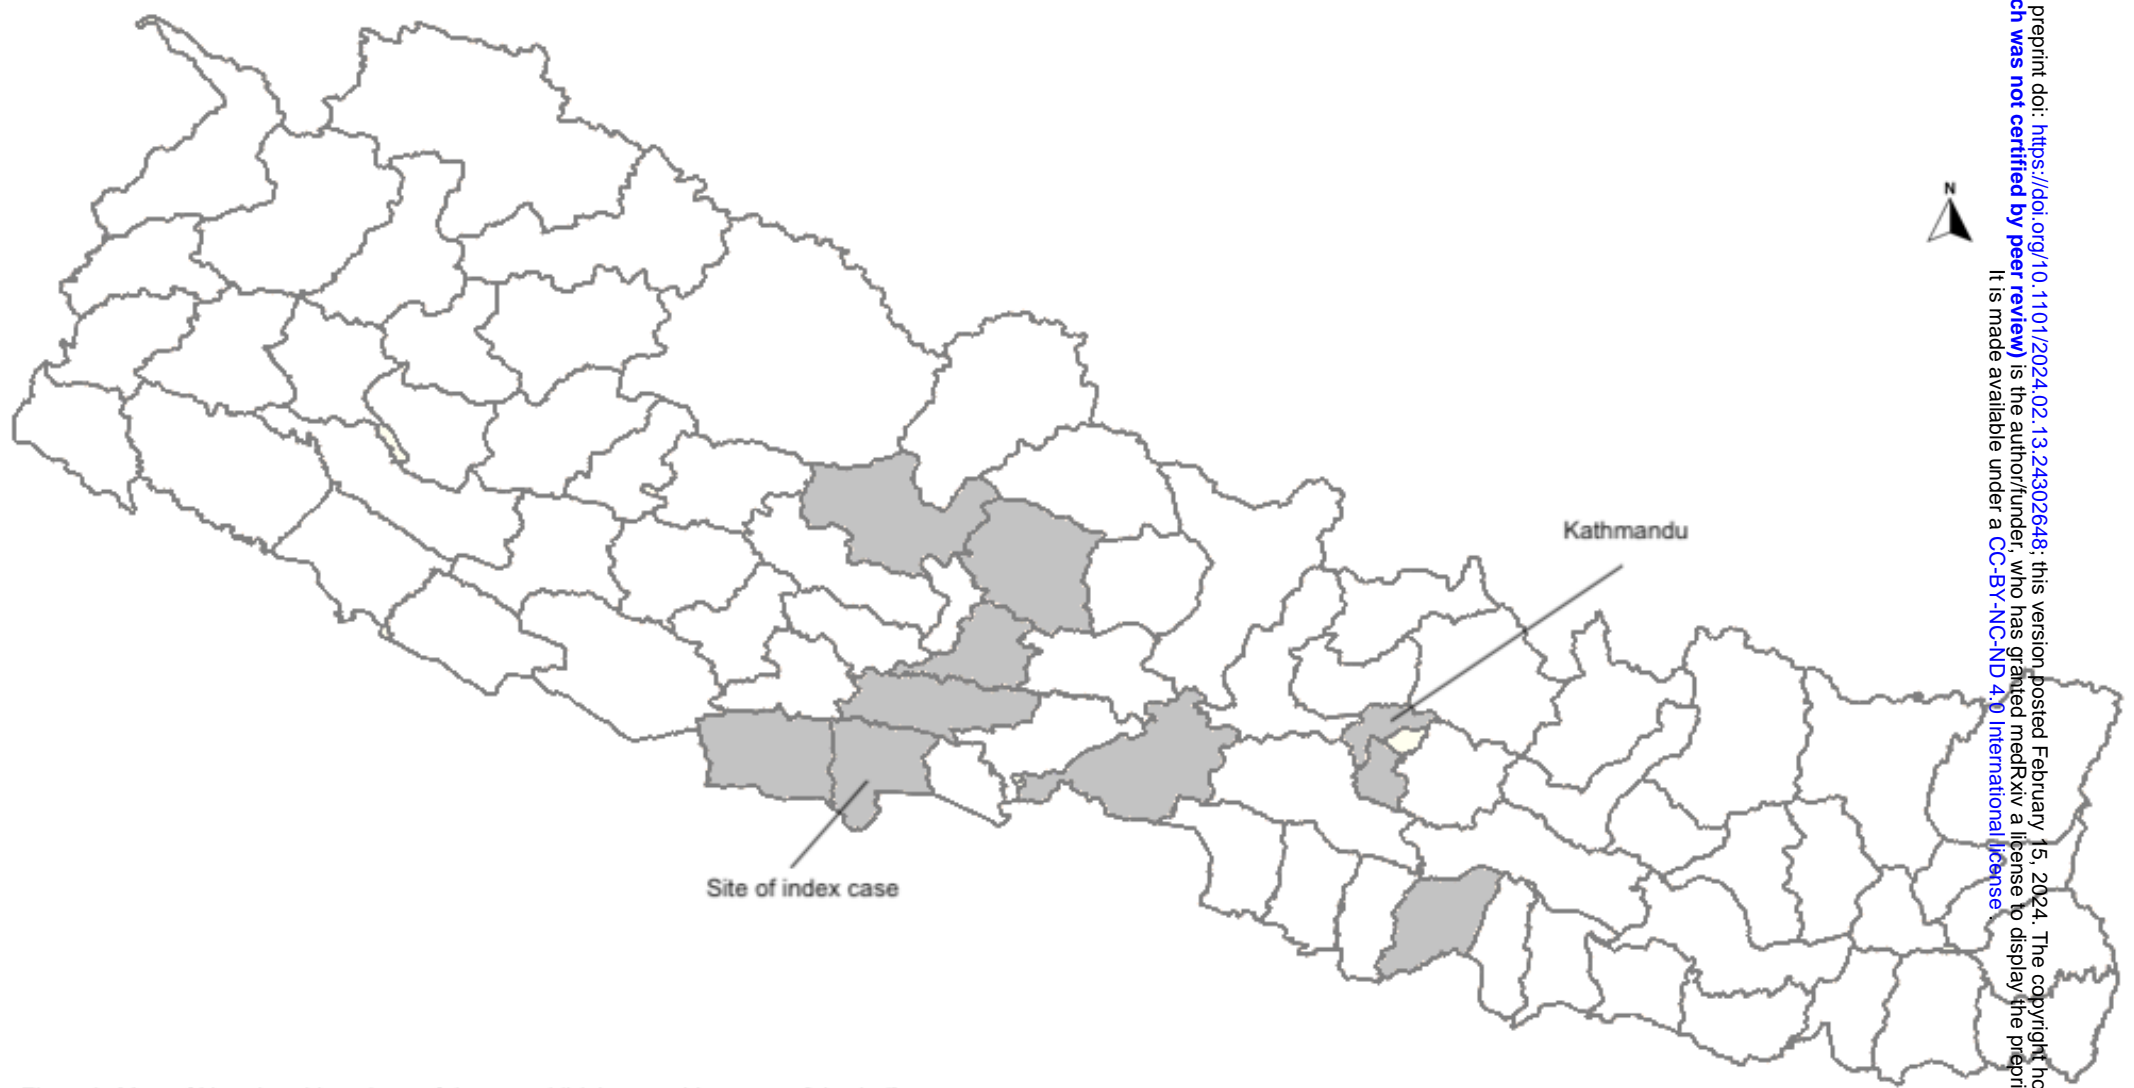

Figure3. Map of Nepal and locations of the gemykibivirus positive cases [shaded].
